# Supplementary material for: Sonochemical synthesis of mesoporous ZrFe2O5 and its application for degradation of recalcitrant pollutants
Source: Royal Society of Chemistry journal article supplement (doi:10.1039/c5ra06148b), 2015-01-01
Supplement: c5ra06148b1.pdf [file c5ra06148b1.pdf]

## Supplementary material for

# Sonochemical Synthesis of Mesoporous $\text{ZrFe}_2\text{O}_5$ and Its Application for Degradation of Recalcitrant Pollutants

Sankar Chakma and Vijayanand S. Moholkar\*

Department of Chemical Engineering

Indian Institute of Technology Guwahati

Guwahati – 781 039, Assam, India

\* Corresponding author. Email: vmoholkar@iitg.ernet.in, Fax: +91 361 2582291

---

---

### A. Assessment of relative contributions of photo-activity and Fenton activity of $\text{ZrFe}_2\text{O}_5$ catalyst

The dye degradation caused by  $\text{ZrFe}_2\text{O}_5$  catalyst is by virtue of its photo-activity as well as Fenton activity due to presence of  $\alpha\text{-Fe}_2\text{O}_3$  phase. The following experiments distinguish between these activities in terms of their relative contribution to dye degradation.

$\text{ZrFe}_2\text{O}_5$  was synthesized through sonochemical route and calcined at a lower temperature of  $650^\circ\text{C}$ , so that the formation of  $\alpha\text{-Fe}_2\text{O}_3$  phase is minimized. The  $\alpha\text{-Fe}_2\text{O}_3$  phase grows with temperature, and it was very difficult to completely eliminate the  $\alpha\text{-Fe}_2\text{O}_3$  phase from the catalyst particles. But  $\text{ZrFe}_2\text{O}_5$  catalyst calcined at lower temperature catalyst has significantly lower percentage of  $\alpha\text{-Fe}_2\text{O}_3$  as compared to the catalyst used in experiments reported in the manuscript. For  $\text{ZrFe}_2\text{O}_5$  calcined at  $650^\circ\text{C}$ , the XRD shows a feeble peak corresponding to  $\alpha\text{-Fe}_2\text{O}_3$  indicating low concentration of this phase.

In the second stage, experiments were performed to compare the degradation efficiency of the two catalysts. In the first step, the photocatalytic activity of the two catalysts was compared in presence of UVA. The results of dye decolorization in photocatalysis with the two catalysts are shown in Fig. S1(B). The decolorization profiles for the two catalysts overlap closely. This clearly indicates that the two catalysts had almost similar photocatalytic activity. This essentially means that even traces of  $\alpha\text{-Fe}_2\text{O}_3$  phase are sufficient to give the hole-electron recombination effect. In second step, the experiments were performed with two catalysts to compare for the Fenton activity in presence of  $\text{H}_2\text{O}_2$ . The results of decolorization profiles are shown in Fig. S1(C). It could be seen that the catalyst calcined at lower temperature gives lesser and slower decolorization indicating reduction in the Fenton activity.

Thus, the above experiments clearly distinguish between the photocatalytic and Fenton activities of the  $\text{ZrFe}_2\text{O}_5$  catalyst, and also show that reduction in the photocatalytic activity due to  $\alpha\text{-Fe}_2\text{O}_3$  phase, providing recombination center for electron-hole pairs, is compensated by the Fenton activity. These results clearly support our conclusions as well.

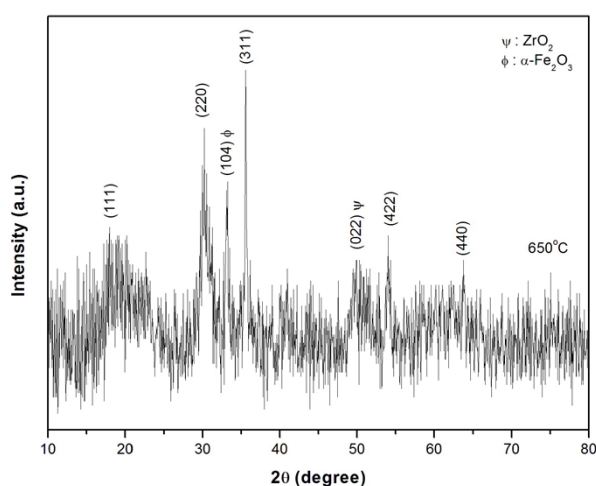

(A.1)

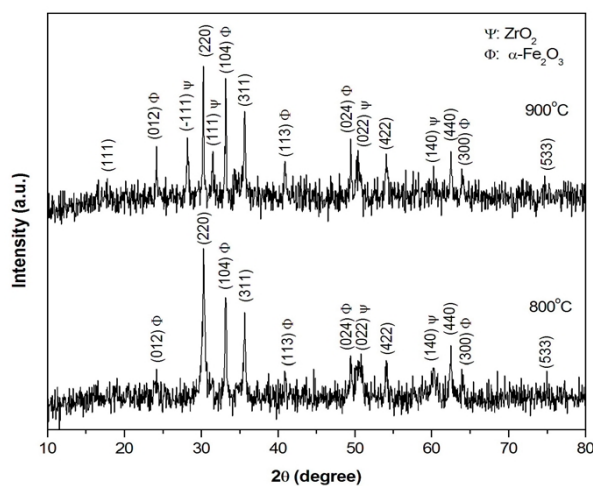

(A.2)

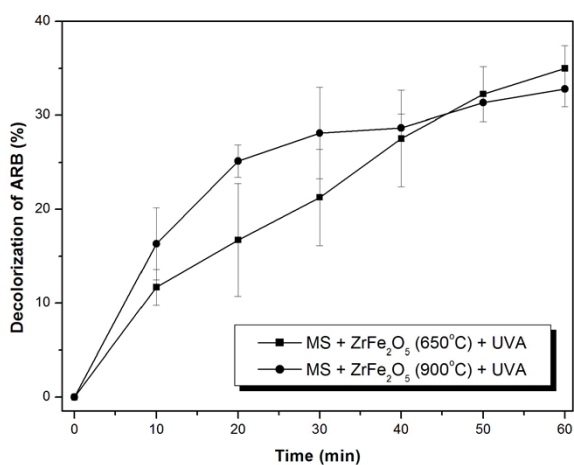

(B.1)

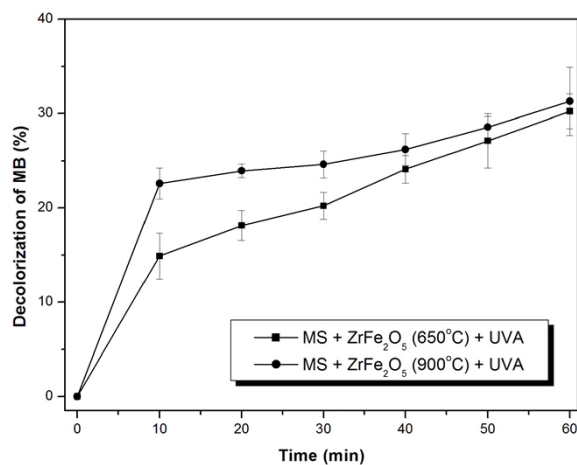

(B.2)

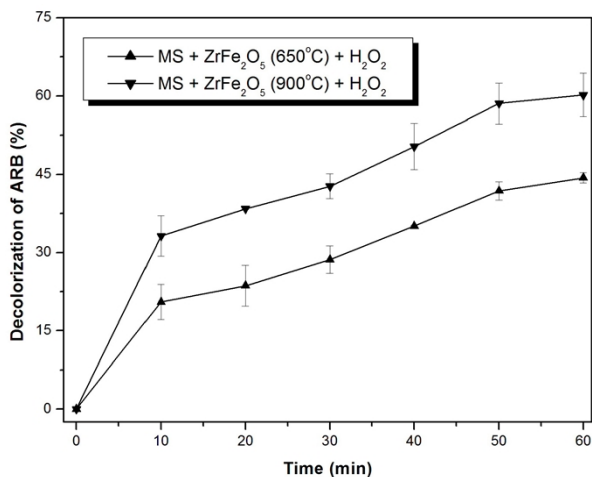

(C.1)

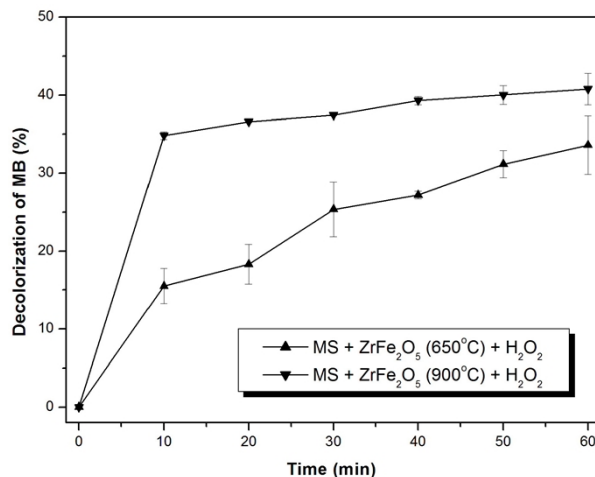

(C.2)

**Figure S1:** (A.1) XRD pattern of ZrFe<sub>2</sub>O<sub>5</sub> calcined at 650°C, (A.2) XRD spectra of ZrFe<sub>2</sub>O<sub>5</sub> calcined at 800°C and 900°C showing the increased of  $\alpha$ -Fe<sub>2</sub>O<sub>3</sub> phases with temperature, (B.1 & B.2) Decolorization profile of ARB and MB dyes under UVA irradiation, (C.1 and C.2) Time profile of decolorization of ARB and MB with high and low percentage of  $\alpha$ -Fe<sub>2</sub>O<sub>3</sub> phase
